# Supplementary material for: Exploring functionalized titania for task specific application of efficient separation of trivalent f-block elements
Source: Royal Society of Chemistry journal article supplement (doi:10.1039/d0nj01014f), 2020-01-01
Supplement: d0nj01014f1.pdf [file d0nj01014f1.pdf]

**Supplementary Table 1:** Analytical results obtained by using Langmuir, D-R, Freundlich and Tempkin isotherm

|                  | Langmuir        |                |          | Dubinin-Radushkevich |                 |          | Freundlich        |     |          | Tempkin         |     |          |
|------------------|-----------------|----------------|----------|----------------------|-----------------|----------|-------------------|-----|----------|-----------------|-----|----------|
|                  | $q_e$<br>(mg/g) | $b$<br>(l/mol) | $\chi^2$ | $x_m$<br>(mg/g)      | $E$<br>(kJ/mol) | $\chi^2$ | $K_f$<br>(mmol/g) | $n$ | $\chi^2$ | $A_T$<br>(L/mg) | $b$ | $\chi^2$ |
| Am <sup>3+</sup> | 67              | 0.03           | 0.999    | 71                   | 11.3            | 0.987    | 66                | 11  | 0.968    | 15              | 37  | 0.955    |
| Eu <sup>3+</sup> | 93              | 0.04           | 0.999    | 89                   | 16.8            | 0.992    | 98                | 10  | 0.966    | 13              | 39  | 0.932    |

**Supplementary Table 2:** Analytical results for sorption kinetics using different models

|                  | Lagergren first order kinetics |           |          | Intra particle diffusion                      |     |          | Pseudo 2 <sup>nd</sup> order |                                               |          |
|------------------|--------------------------------|-----------|----------|-----------------------------------------------|-----|----------|------------------------------|-----------------------------------------------|----------|
|                  | $q_e$                          | $k_{ads}$ | $\chi^2$ | $k_p$ (mg g <sup>-1</sup> min <sup>-1</sup> ) | $C$ | $\chi^2$ | $q_e$ (mg g <sup>-1</sup> )  | $k_2$ (mg g <sup>-1</sup> min <sup>-1</sup> ) | $\chi^2$ |
| Am <sup>3+</sup> | 15                             | 0.03      | 0.904    | 31                                            | 19  | 0.955    | 71                           | 6.1E-04                                       | 0.999    |
| Eu <sup>3+</sup> | 19                             | 0.04      | 0.935    | 39                                            | 31  | 0.943    | 97                           | 8.6E-04                                       | 0.999    |

**Supplementary Table 3:** Bond length, coordination number and disorder factor obtain by EXAFS fitting at Ti K-edge and Eu L3 edge.

| Ti K edge |            |               | Eu L3 edge |            |               |
|-----------|------------|---------------|------------|------------|---------------|
| Path      | Parameters | Eu:DPA        | Path       | Parameters | Eu:DPA        |
| Ti-O      | R (Å)      | 1.88±0.02     | Eu-O       | R (Å)      | 2.19±0.01     |
|           | N          | 4.03±0.24     |            | N          | 2.26±0.27     |
|           | $\sigma^2$ | 0.0036±0.0010 |            | $\sigma^2$ | 0.0015±0.0010 |
| Ti-Ti     | R (Å)      | 2.83±0.03     | Eu-O       | R (Å)      | 2.39±0.02     |
|           | N          | 3.16±0.24     |            | N          | 7.91±0.98     |
|           | $\sigma^2$ | 0.0014±0.0011 |            | $\sigma^2$ | 0.0048±0.0017 |
| Ti-Ti     | R (Å)      | 3.58±0.03     | Eu-N       | R (Å)      | 3.01±0.04     |
|           | N          | 1.05±0.12     |            | N          | 4.52±0.56     |
|           | $\sigma^2$ | 0.0014±0.0011 |            | $\sigma^2$ | 0.0072±0.0013 |
|           |            |               | Eu-C       | R (Å)      | 3.88±0.05     |
|           |            |               |            | N          | 9.04±1.36     |
|           |            |               |            | $\sigma^2$ | 0.0047±0.0018 |

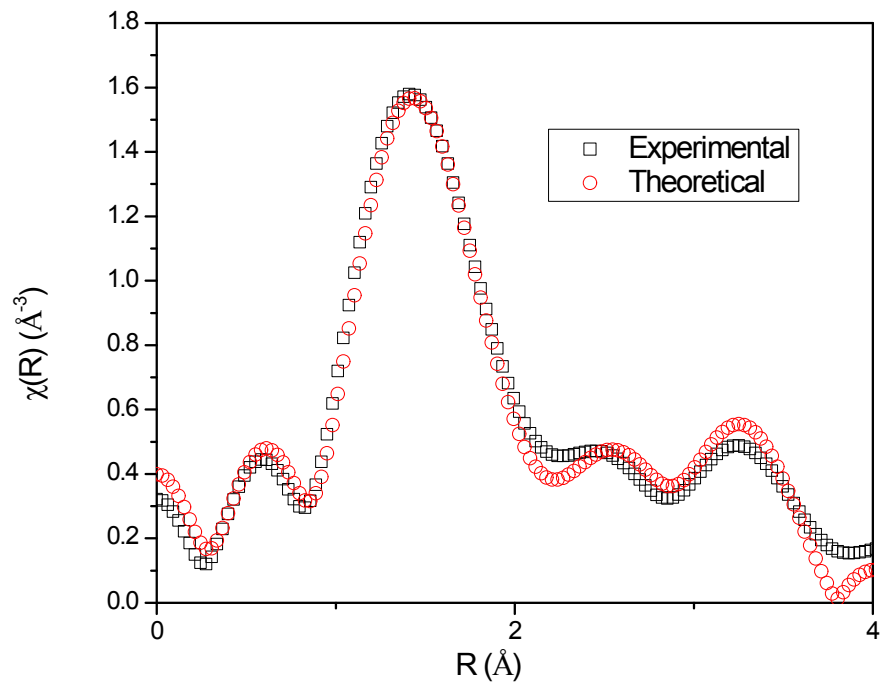

**Supplementary Fig. 1:** Fourier transformed EXAFS spectra at Ti K-edge of Anatase  $\text{TiO}_2$

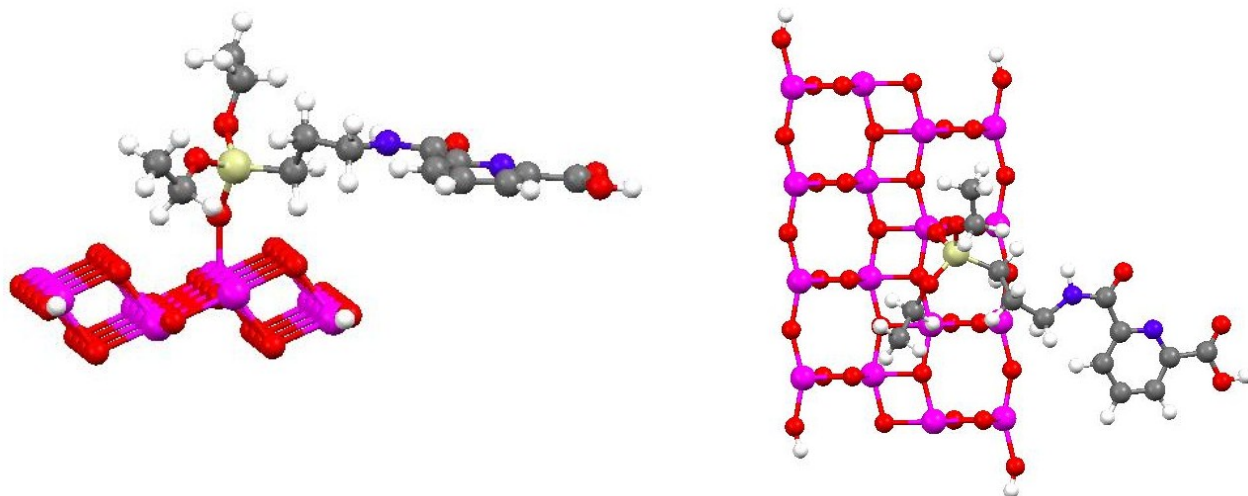

**Supplementary Fig. 2:** Optimized structures of TiO<sub>2</sub>-APTES-DPA molecule
